# Supplementary material for: Characterization of visceral and subcutaneous adipose tissue transcriptome in pregnant women with and without spontaneous labor at term: implication of alternative splicing in the metabolic adaptations of adipose tissue to parturition
Source: publisher site journal article supplement (doi:10.1515/jpm-2015-0259), 2016-01-01
Supplement: Supplementary file 1 [file S1_Table.xls]

## Sheet: TableS1
ENTREZ	SYMBOL	Name	Fold Change	q-value
364	AQP7	aquaporin 7	1.62719	0.00702032
355	FAS	Fas (TNF receptor superfamily, member 6)	-1.88552	0.00702032
100293763	AQP7P1	aquaporin 7 pseudogene 1	1.78202	0.00702032
9871*	SEC24D	SEC24 family, member D (S. cerevisiae)	-1.65876	0.00702032
83666*	PARP9	poly (ADP-ribose) polymerase family, member 9	-1.57981	0.00764149
729085*	CCBP2	chemokine binding protein 2	-1.56503	0.00764149
6285	S100B	S100 calcium binding protein B	1.56833	0.00764149
10555	AGPAT2	1-acylglycerol-3-phosphate O-acyltransferase 2 (lysophosphatidic acid acyltransferase, beta)	1.55168	0.00764149
6574	SLC20A1	solute carrier family 20 (phosphate transporter), member 1	-1.85414	0.00764149
54566	EPB41L4B	erythrocyte membrane protein band 4.1 like 4B	1.63713	0.00764149
58477*	SRPRB	signal recognition particle receptor, B subunit	-1.7725	0.00764149
54988*	ACSM5	acyl-CoA synthetase medium-chain family member 5	1.55189	0.00764149
9180	OSMR	oncostatin M receptor	-1.91378	0.00764149
284221	FAM38B2	family with sequence similarity 38, member B2	-1.95129	0.00764149
2819	GPD1	glycerol-3-phosphate dehydrogenase 1 (soluble)	1.73765	0.00764149
9052	GPRC5A	G protein-coupled receptor, family C, group 5, member A	-1.69707	0.00764149
10973*	ASCC3	activating signal cointegrator 1 complex subunit 3	-1.5241	0.00764149
6517	SLC2A4	solute carrier family 2 (facilitated glucose transporter), member 4	1.56933	0.00764149
6713	SQLE	squalene epoxidase	-1.59897	0.00764149
83716	CRISPLD2	cysteine-rich secretory protein LCCL domain containing 2	-1.87664	0.00764149
10249	GLYAT	glycine-N-acyltransferase	2.40426	0.00764149
23555	TSPAN15	tetraspanin 15	1.64533	0.00764149
8908	GYG2	glycogenin 2	1.51428	0.00764149
5578	PRKCA	protein kinase C, alpha	-1.54143	0.00764149
54884	RETSAT	retinol saturase (all-trans-retinol 13,14-reductase)	1.59702	0.00764149
5055	SERPINB2	serpin peptidase inhibitor, clade B (ovalbumin), member 2	-4.92609	0.00764149
57568*	SIPA1L2	signal-induced proliferation-associated 1 like 2	-1.5285	0.00764149
5207	PFKFB1	6-phosphofructo-2-kinase/fructose-2,6-biphosphatase 1	1.86078	0.00764149
60559*	SPCS3	signal peptidase complex subunit 3 homolog (S. cerevisiae)	-1.63963	0.00764149
9197*	SLC33A1	solute carrier family 33 (acetyl-CoA transporter), member 1	-1.5144	0.00764149
3991	LIPE	lipase, hormone-sensitive	1.6204	0.00764149
26064*	RAI14	retinoic acid induced 14	-1.58264	0.00764149
8542*	APOL1	apolipoprotein L, 1	-1.57027	0.00764149
374969	CCDC23	coiled-coil domain containing 23	1.53262	0.00764149
8639	AOC3	amine oxidase, copper containing 3 (vascular adhesion protein 1)	1.58619	0.00764149
11098	PRSS23	protease, serine, 23	-1.66724	0.00764149
2822	GPLD1	glycosylphosphatidylinositol specific phospholipase D1	1.69907	0.00814955
8659	ALDH4A1	aldehyde dehydrogenase 4 family, member A1	1.80908	0.00814955
4718	THRSP	thyroid hormone responsive (SPOT14 homolog, rat)	1.79688	0.00814955
55024*	BANK1	B-cell scaffold protein with ankyrin repeats 1	1.59501	0.00814955
6782*	HSPA13	heat shock protein 70kDa family, member 13	-1.77997	0.00814955
65983	GRAMD3	GRAM domain containing 3	-1.81858	0.00814955
4137	MAPT	microtubule-associated protein tau	1.61164	0.00814955
1009	CDH11	cadherin 11, type 2, OB-cadherin (osteoblast)	-1.97506	0.00814955
10130*	PDIA6	protein disulfide isomerase family A, member 6	-1.52699	0.00814955
51602*	NOP58	NOP58 ribonucleoprotein homolog (yeast)	-1.63954	0.00837169
81539	SLC38A1	solute carrier family 38, member 1	-2.381	0.00837169
51716	CES1	carboxylesterase 1 (monocyte/macrophage serine esterase 1)	2.2214	0.00837169
9643*	MORF4L2	mortality factor 4 like 2	-1.52509	0.00837169
666	BOK	BCL2-related ovarian killer	1.57657	0.00837169
9945	GFPT2	glutamine-fructose-6-phosphate transaminase 2	-2.41495	0.00837169
55254*	TMEM39A	transmembrane protein 39A	-1.52994	0.00837169
22915	MMRN1	multimerin 1	-3.78239	0.00837169
84293	C10orf58	chromosome 10 open reading frame 58	1.62752	0.00837169
64757	MOSC1	MOCO sulphurase C-terminal domain containing 1	1.61405	0.00839897
64805*	P2RY12	purinergic receptor P2Y, G-protein coupled, 12	1.59917	0.00839897
91607	SLFN13	schlafen family member 13	-1.50035	0.00855791
220	ALDH1A3	aldehyde dehydrogenase 1 family, member A3	-2.32803	0.00855791
212*	ALAS2	aminolevulinate, delta-, synthase 2	1.65766	0.00855791
10962	MLLT11	myeloid/lymphoid or mixed-lineage leukemia (trithorax homolog, Drosophila); translocated to, 11	-2.20265	0.00855791
358*	AQP1	aquaporin 1 (Colton blood group)	-1.54623	0.00855791
23612*	PHLDA3	pleckstrin homology-like domain, family A, member 3	1.5063	0.00855791
6578	SLCO2A1	solute carrier organic anion transporter family, member 2A1	-1.72784	0.00855791
286753*	TUSC5	tumor suppressor candidate 5	1.53544	0.00855791
5271*	SERPINB8	serpin peptidase inhibitor, clade B (ovalbumin), member 8	-1.67107	0.00863857
63924	CIDEC	cell death-inducing DFFA-like effector c	1.76124	0.00864924
4189*	DNAJB9	DnaJ (Hsp40) homolog, subfamily B, member 9	-1.67979	0.00864924
56265	CPXM1	carboxypeptidase X (M14 family), member 1	-1.72475	0.00868994
58528*	RRAGD	Ras-related GTP binding D	1.53008	0.00868994
262*	AMD1	adenosylmethionine decarboxylase 1	-1.53247	0.00870134
222166	C7orf41	chromosome 7 open reading frame 41	1.60657	0.00877858
338	APOB	apolipoprotein B (including Ag(x) antigen)	2.44399	0.00877858
158295	MGC24103	hypothetical MGC24103	-1.54673	0.00877858
1805*	DPT	dermatopontin	1.53552	0.00878415
10237*	SLC35B1	solute carrier family 35, member B1	-1.53064	0.00878712
623	BDKRB1	bradykinin receptor B1	-3.00074	0.00878712
5740	PTGIS	prostaglandin I2 (prostacyclin) synthase	-1.97803	0.00878712
6272	SORT1	sortilin 1	1.66591	0.00878712
1645	AKR1C2	aldo-keto reductase family 1, member C2 (dihydrodiol dehydrogenase 2; bile acid binding protein; 3-alpha hydroxysteroid dehydrogenase, type III)	2.06445	0.00896646
5649	RELN	reelin	-1.56409	0.00896646
6446	SGK1	serum/glucocorticoid regulated kinase 1	-1.89027	0.00896646
51330	TNFRSF12A	tumor necrosis factor receptor superfamily, member 12A	-1.83819	0.00896646
388403*	YPEL2	yippee-like 2 (Drosophila)	1.66073	0.00896646
80704	SLC19A3	solute carrier family 19, member 3	1.51351	0.00896646
5140	PDE3B	phosphodiesterase 3B, cGMP-inhibited	1.71241	0.00898624
3036	HAS1	hyaluronan synthase 1	-1.73149	0.00898624
1646	AKR1C1	aldo-keto reductase family 1, member C1 (dihydrodiol dehydrogenase 1; 20-alpha (3-alpha)-hydroxysteroid dehydrogenase)	2.33964	0.00898624
1962	EHHADH	enoyl-Coenzyme A, hydratase/3-hydroxyacyl Coenzyme A dehydrogenase	1.543	0.00898624
90355*	C5orf30	chromosome 5 open reading frame 30	1.61581	0.00898624
283383	GPR133	G protein-coupled receptor 133	-2.08067	0.00898624
4199	ME1	malic enzyme 1, NADP(+)-dependent, cytosolic	1.71587	0.00898624
6366	CCL21	chemokine (C-C motif) ligand 21	-3.49909	0.00898624
4023	LPL	lipoprotein lipase	1.5618	0.00898624
6385	SDC4	syndecan 4	-2.52736	0.00898624
84649	DGAT2	diacylglycerol O-acyltransferase homolog 2 (mouse)	1.59943	0.00898624
80339*	PNPLA3	patatin-like phospholipase domain containing 3	1.61263	0.00898624
783	CACNB2	calcium channel, voltage-dependent, beta 2 subunit	-1.69319	0.00898624
7086	TKT	transketolase	1.543	0.00898624
63895*	FAM38B	family with sequence similarity 38, member B	-1.59402	0.00900738
4883	NPR3	natriuretic peptide receptor C/guanylate cyclase C (atrionatriuretic peptide receptor C)	1.80058	0.00907089
55959	SULF2	sulfatase 2	-1.95008	0.00907089
1368	CPM	carboxypeptidase M	2.0937	0.00907089
6649	SOD3	superoxide dismutase 3, extracellular	1.60771	0.00907089
9627	SNCAIP	synuclein, alpha interacting protein	-1.52531	0.0091715
143098	MPP7	membrane protein, palmitoylated 7 (MAGUK p55 subfamily member 7)	-1.53633	0.00919438
59271	C21orf63	chromosome 21 open reading frame 63	-1.70741	0.00919438
115330	GPR146	G protein-coupled receptor 146	1.69993	0.00919438
100130330	FHL1	four and a half LIM domains 1	1.50419	0.00923152
10447	FAM3C	family with sequence similarity 3, member C	-1.67428	0.00927942
10525*	HYOU1	hypoxia up-regulated 1	-1.61141	0.00930903
5502	PPP1R1A	protein phosphatase 1, regulatory (inhibitor) subunit 1A	1.57021	0.00930903
90701*	SEC11C	SEC11 homolog C (S. cerevisiae)	-1.8232	0.00930903
222962*	SLC29A4	solute carrier family 29 (nucleoside transporters), member 4	1.51394	0.00943694
6542	SLC7A2	solute carrier family 7 (cationic amino acid transporter, y+ system), member 2	-1.73989	0.00943694
1728	NQO1	NAD(P)H dehydrogenase, quinone 1	1.63083	0.00946174
11145	PLA2G16	phospholipase A2, group XVI	1.50949	0.00950524
6495	SIX1	SIX homeobox 1	2.00361	0.00957375
10125	RASGRP1	RAS guanyl releasing protein 1 (calcium and DAG-regulated)	-1.5667	0.00957375
3914	LAMB3	laminin, beta 3	1.68322	0.00960314
148534	TMEM56	transmembrane protein 56	1.56327	0.00964658
10216	PRG4	proteoglycan 4	-2.61485	0.0096592
2521*	FUS	fusion (involved in t(12;16) in malignant liposarcoma)	-1.51412	0.0096721
84910*	TMEM87B	transmembrane protein 87B	-1.51952	0.0096721
629	CFB	complement factor B	-3.90165	0.00981579
3240	HPR	haptoglobin-related protein	-5.75037	0.00987646
26585	GREM1	gremlin 1, cysteine knot superfamily, homolog (Xenopus laevis)	-2.34274	0.0102113
5950	RBP4	retinol binding protein 4, plasma	1.65242	0.0102113
3554	IL1R1	interleukin 1 receptor, type I	-1.74803	0.0102962
56920	SEMA3G	sema domain, immunoglobulin domain (Ig), short basic domain, secreted, (semaphorin) 3G	1.86969	0.0104269
93986	FOXP2	forkhead box P2	1.51885	0.0107271
4830*	NME1	non-metastatic cells 1, protein (NM23A) expressed in	-1.57324	0.0107456
7076	TIMP1	TIMP metallopeptidase inhibitor 1	-2.00851	0.0108234
59272	ACE2	angiotensin I converting enzyme (peptidyl-dipeptidase A) 2	-1.66945	0.0109834
9456	HOMER1	homer homolog 1 (Drosophila)	-1.59928	0.0109834
80760	ITIH5	inter-alpha (globulin) inhibitor H5	2.14569	0.0111077
55276*	PGM2	phosphoglucomutase 2	-1.65605	0.0111447
4889*	NPY5R	neuropeptide Y receptor Y5	1.58988	0.0112822
6910	TBX5	T-box 5	1.70667	0.0112822
116984	ARAP2	ArfGAP with RhoGAP domain, ankyrin repeat and PH domain 2	-1.73028	0.0114572
79094	CHAC1	ChaC, cation transport regulator homolog 1 (E. coli)	-3.03497	0.0115639
63982	ANO3	anoctamin 3	2.23353	0.0115639
3250	HP	haptoglobin	-7.81143	0.0115639
9508	ADAMTS3	ADAM metallopeptidase with thrombospondin type 1 motif, 3	-1.79876	0.0115639
79614	C5orf23	chromosome 5 open reading frame 23	1.9839	0.0116238
2036	EPB41L1	erythrocyte membrane protein band 4.1-like 1	1.66655	0.0117839
146857	SLFN11	schlafen family member 11	-1.51785	0.0118857
8038	ADAM12	ADAM metallopeptidase domain 12	1.84378	0.0118857
7223	TRPC4	transient receptor potential cation channel, subfamily C, member 4	-2.2715	0.0118922
768211	C4orf19	chromosome 4 open reading frame 19	1.55749	0.0119304
80129*	C6orf97	chromosome 6 open reading frame 97	1.51299	0.0120248
55847*	CISD1	CDGSH iron sulfur domain 1	-1.59955	0.0122132
9645	MICAL2	microtubule associated monoxygenase, calponin and LIM domain containing 2	-1.52928	0.0122132
9397	NMT2	N-myristoyltransferase 2	1.70474	0.0122677
92558	CCDC64	coiled-coil domain containing 64	-2.04439	0.0123292
22903	BTBD3	BTB (POZ) domain containing 3	-1.867	0.0123292
5069	PAPPA	pregnancy-associated plasma protein A, pappalysin 1	-2.35133	0.0123292
8740*	TNFSF14	tumor necrosis factor (ligand) superfamily, member 14	-1.53369	0.0123304
221830*	TWISTNB	TWIST neighbor	-1.5974	0.0124035
257415*	BICC1	bicaudal C homolog 1 (Drosophila)	-1.62749	0.0126021
401265*	KLHL31	kelch-like 31 (Drosophila)	1.611	0.0126479
7018	TF	transferrin	1.91545	0.0126479
8204	NRIP1	nuclear receptor interacting protein 1	1.53447	0.0126479
1756	DMD	dystrophin	1.62082	0.0126479
5999	RGS4	regulator of G-protein signaling 4	-3.95923	0.0126479
440049	CCND1	cyclin D1	2.11103	0.0126479
5054	SERPINE1	serpin peptidase inhibitor, clade E (nexin, plasminogen activator inhibitor type 1), member 1	-1.79536	0.0128354
5618	PRLR	prolactin receptor	-3.7685	0.0128354
55784	MCTP2	multiple C2 domains, transmembrane 2	-2.55236	0.0128354
10544*	PROCR	protein C receptor, endothelial (EPCR)	-1.64801	0.0128354
4345	CD200	CD200 molecule	-2.71976	0.0128354
4915	NTRK2	neurotrophic tyrosine kinase, receptor, type 2	1.71504	0.0128354
84636	GPR174	G protein-coupled receptor 174	-1.79264	0.0128354
6470	SHMT1	serine hydroxymethyltransferase 1 (soluble)	1.50266	0.0128354
51200	CPA4	carboxypeptidase A4	-2.69465	0.0128354
50937	CDON	Cdon homolog (mouse)	-1.74431	0.0128881
3309*	HSPA5	heat shock 70kDa protein 5 (glucose-regulated protein, 78kDa)	-1.69806	0.0129077
3225	HOXC9	homeobox C9	1.6735	0.0129234
10205	MPZL2	myelin protein zero-like 2	-1.78186	0.0129234
7412	VCAM1	vascular cell adhesion molecule 1	-2.12212	0.013024
9173	IL1RL1	interleukin 1 receptor-like 1	-2.41199	0.0130661
5334	PLCL1	phospholipase C-like 1	-1.5282	0.013155
55076	TMEM45A	transmembrane protein 45A	-2.85206	0.0133317
91370	LIF	leukemia inhibitory factor (cholinergic differentiation factor)	-1.70521	0.0133348
2919	CXCL1	chemokine (C-X-C motif) ligand 1 (melanoma growth stimulating activity, alpha)	-1.74634	0.0133874
79875	THSD4	thrombospondin, type I, domain containing 4	-1.53759	0.0133874
4953	ODC1	ornithine decarboxylase 1	-1.64955	0.0133874
166929	SGMS2	sphingomyelin synthase 2	-1.98571	0.0133874
51327*	ERAF	erythroid associated factor	1.55518	0.0133874
56062	KLHL4	kelch-like 4 (Drosophila)	-1.65688	0.0133874
57502*	NLGN4X	neuroligin 4, X-linked	-1.50533	0.0133874
10447	FAM3C	family with sequence similarity 3, member C	-1.60304	0.0133874
3912	LAMB1	laminin, beta 1	-1.57474	0.0134483
6566	SLC16A1	solute carrier family 16, member 1 (monocarboxylic acid transporter 1)	-2.60252	0.0135258
143903	LAYN	layilin	-1.96756	0.013656
55825	PECR	peroxisomal trans-2-enoyl-CoA reductase	1.54641	0.0136772
5327	PLAT	plasminogen activator, tissue	-1.93658	0.0138812
91768*	CABLES1	Cdk5 and Abl enzyme substrate 1	1.51227	0.0138854
3820	KLRB1	killer cell lectin-like receptor subfamily B, member 1	-1.58439	0.0138854
6590	SLPI	secretory leukocyte peptidase inhibitor	-3.14616	0.0140271
10561*	IFI44	interferon-induced protein 44	-1.50627	0.0140271
10630	PDPN	podoplanin	-2.08298	0.0140271
1001	CDH3	cadherin 3, type 1, P-cadherin (placental)	-2.6955	0.0141489
639	PRDM1	PR domain containing 1, with ZNF domain	-1.62605	0.0141489
7033	TFF3	trefoil factor 3 (intestinal)	-1.95786	0.0141489
23768	FLRT2	fibronectin leucine rich transmembrane protein 2	-2.15462	0.0152488
261729*	STEAP2	six transmembrane epithelial antigen of the prostate 2	-1.69322	0.0152499
25891	PAMR1	peptidase domain containing associated with muscle regeneration 1	-2.12341	0.015293
25805*	BAMBI	BMP and activin membrane-bound inhibitor homolog (Xenopus laevis)	-1.53664	0.015293
7052	TGM2	transglutaminase 2 (C polypeptide, protein-glutamine-gamma-glutamyltransferase)	-2.22614	0.0153431
3952	LEP	leptin	3.08505	0.0153756
23743	BHMT2	betaine-homocysteine methyltransferase 2	1.91442	0.0153775
998	LY6E	lymphocyte antigen 6 complex, locus E	-1.71331	0.0153775
3875	KRT18	keratin 18	-3.08392	0.0154511
57493	HEG1	HEG homolog 1 (zebrafish)	-1.69763	0.0154511
3003	GZMK	granzyme K (granzyme 3; tryptase II)	-2.09351	0.0155627
476*	ATP1A1	ATPase, Na+/K+ transporting, alpha 1 polypeptide	-1.50046	0.0155863
27314	RAB30	RAB30, member RAS oncogene family	1.60195	0.015788
185	AGTR1	angiotensin II receptor, type 1	1.65047	0.0158024
3856	KRT8	keratin 8	-2.8292	0.0158024
1118*	CHIT1	chitinase 1 (chitotriosidase)	2.21036	0.0158827
4920	ROR2	receptor tyrosine kinase-like orphan receptor 2	-1.82428	0.0159164
169792	GLIS3	GLIS family zinc finger 3	-1.65158	0.0159541
8869	ST3GAL5	ST3 beta-galactoside alpha-2,3-sialyltransferase 5	-1.68036	0.0160116
64163	IFRG15	interferon responsive gene 15	-1.75686	0.0160116
8854	ALDH1A2	aldehyde dehydrogenase 1 family, member A2	-3.47481	0.0160268
3479	IGF1	insulin-like growth factor 1 (somatomedin C)	1.53606	0.0160268
10893	MMP24	matrix metallopeptidase 24 (membrane-inserted)	-2.00776	0.0160268
367	AR	androgen receptor	1.63947	0.0167086
4139	MARK1	MAP/microtubule affinity-regulating kinase 1	1.58303	0.0167108
4211	MEIS1	Meis homeobox 1	-1.94955	0.0167289
56925	LXN	latexin	-1.97056	0.0167425
26227*	PHGDH	phosphoglycerate dehydrogenase	-1.50674	0.0167742
2210*	FCGR1A	Fc fragment of IgG, high affinity Ia, receptor (CD64)	-1.57211	0.0169103
27295	PDLIM3	PDZ and LIM domain 3	-1.93247	0.0169672
948	CD36	CD36 molecule (thrombospondin receptor)	1.50179	0.0170635
9729	C6orf174	chromosome 6 open reading frame 174	1.6201	0.0170635
150	ADRA2A	adrenergic, alpha-2A-, receptor	1.72963	0.0170863
151195*	CCNYL1	cyclin Y-like 1	-1.71899	0.0170882
23213	SULF1	sulfatase 1	-2.26931	0.0171057
10144	FAM13A	family with sequence similarity 13, member A	1.50024	0.0172384
1545	CYP1B1	cytochrome P450, family 1, subfamily B, polypeptide 1	-1.7918	0.0173306
3899	AFF3	AF4/FMR2 family, member 3	1.73565	0.0173864
93035	PKHD1L1	polycystic kidney and hepatic disease 1 (autosomal recessive)-like 1	-6.0177	0.0174306
85012	TCEAL6	transcription elongation factor A (SII)-like 6	-1.62514	0.0174768
330	BIRC3	baculoviral IAP repeat-containing 3	-1.5014	0.0175118
3696	ITGB8	integrin, beta 8	-4.71061	0.0175118
10904	NNAT	neuronatin	2.69556	0.0175817
3679	ITGA7	integrin, alpha 7	1.54027	0.0176198
64116	SLC39A8	solute carrier family 39 (zinc transporter), member 8	-4.25485	0.0176822
4653*	MYOC	myocilin, trabecular meshwork inducible glucocorticoid response	1.85195	0.0176929
5627	PROS1	protein S (alpha)	-1.51315	0.0177561
57678	GPAM	glycerol-3-phosphate acyltransferase, mitochondrial	1.54608	0.0178689
51352	WIT1	Wilms tumor upstream neighbor 1	-3.44823	0.0179831
6860	SYT4	synaptotagmin IV	-2.69059	0.0179846
93145	OLFM2	olfactomedin 2	1.63888	0.0179888
23314	SATB2	SATB homeobox 2	1.75806	0.0180125
23231	KIAA0746	KIAA0746 protein	-1.82913	0.0189695
64102	TNMD	tenomodulin	1.61423	0.0189695
7490	WT1	Wilms tumor 1	-2.86111	0.0189841
1807	DPYS	dihydropyrimidinase	-2.28576	0.0194116
54809*	SAMD9	sterile alpha motif domain containing 9	-1.52581	0.0194116
1116*	CHI3L1	chitinase 3-like 1 (cartilage glycoprotein-39)	-1.85552	0.0194116
157*	ADRBK2	adrenergic, beta, receptor kinase 2	1.51594	0.0194116
91404	SESTD1	SEC14 and spectrin domains 1	1.67669	0.0194116
202151*	RANBP3L	RAN binding protein 3-like	1.72742	0.0194772
6096	RORB	RAR-related orphan receptor B	-2.44776	0.0196522
7855*	FZD5	frizzled homolog 5 (Drosophila)	1.51826	0.0197488
1393*	CRHBP	corticotropin releasing hormone binding protein	1.55117	0.0200621
6492	SIM1	single-minded homolog 1 (Drosophila)	2.40351	0.0200647
84935*	C13orf33	chromosome 13 open reading frame 33	-1.55305	0.0200647
3552	IL1A	interleukin 1, alpha	-2.23817	0.02022
3426	CFI	complement factor I	-2.7714	0.0204816
9037	SEMA5A	sema domain, seven thrombospondin repeats (type 1 and type 1-like), transmembrane domain (TM) and short cytoplasmic domain, (semaphorin) 5A	-2.06761	0.0204816
7145	TNS1	tensin 1	1.54193	0.0209646
23428	SLC7A8	solute carrier family 7 (cationic amino acid transporter, y+ system), member 8	-1.53188	0.0210387
22943	DKK1	dickkopf homolog 1 (Xenopus laevis)	-4.59045	0.0211267
3226	HOXC10	homeobox C10	2.15012	0.0212022
342035	GLDN	gliomedin	1.54228	0.0214329
100294156	C4B	complement component 4B (Chido blood group)	-4.2555	0.0215438
157506	RDH10	retinol dehydrogenase 10 (all-trans)	-1.67574	0.021668
83875	BCO2	beta-carotene oxygenase 2	-1.84538	0.0217159
225	ABCD2	ATP-binding cassette, sub-family D (ALD), member 2	2.26171	0.0218829
4081	MAB21L1	mab-21-like 1 (C. elegans)	1.59709	0.0220553
51050*	PI15	peptidase inhibitor 15	-1.60887	0.0220553
23414	ZFPM2	zinc finger protein, multitype 2	-1.65646	0.0221136
84886	C1orf198	chromosome 1 open reading frame 198	1.65858	0.0221383
4599*	MX1	myxovirus (influenza virus) resistance 1, interferon-inducible protein p78 (mouse)	-1.5544	0.0224257
27133*	KCNH5	potassium voltage-gated channel, subfamily H (eag-related), member 5	-1.6016	0.0224472
230	ALDOC	aldolase C, fructose-bisphosphate	1.70657	0.0224716
5320	PLA2G2A	phospholipase A2, group IIA (platelets, synovial fluid)	-2.17196	0.0225294
1446*	CSN1S1	casein alpha s1	1.59812	0.0225294
10950	CXADR	coxsackie virus and adenovirus receptor	-4.47743	0.0229191
8076	MFAP5	microfibrillar associated protein 5	2.56741	0.0229191
79804	NBLA00301	Nbla00301	-2.41616	0.0229191
3485	IGFBP2	insulin-like growth factor binding protein 2, 36kDa	-2.36528	0.0229246
8839	WISP2	WNT1 inducible signaling pathway protein 2	1.92849	0.0231493
6352	CCL5	chemokine (C-C motif) ligand 5	-1.72266	0.0233027
9076	CLDN1	claudin 1	-6.96393	0.0235294
722	C4BPA	complement component 4 binding protein, alpha	-1.88803	0.023786
845	CASQ2	calsequestrin 2 (cardiac muscle)	2.46145	0.0241734
759*	CA1	carbonic anhydrase I	1.522	0.0247631
718	C3	complement component 3	-1.59349	0.0250197
64881	PCDH20	protocadherin 20	-1.66587	0.0253363
11343	MGLL	monoglyceride lipase	1.67844	0.0253436
5273*	SERPINB10	serpin peptidase inhibitor, clade B (ovalbumin), member 10	-1.60725	0.0253763
6303	SAT1	spermidine/spermine N1-acetyltransferase 1	-1.52401	0.0255154
244	ANXA8	annexin A8	-4.51406	0.0255195
5879	DKK2	dickkopf homolog 2 (Xenopus laevis)	1.89056	0.025798
5213	PFKM	phosphofructokinase, muscle	-1.73229	0.025798
5243	ABCB1	ATP-binding cassette, sub-family B (MDR/TAP), member 1	-1.6067	0.0260629
100131599	PLCB1	phospholipase C, beta 1 (phosphoinositide-specific)	-1.62435	0.0261975
4982*	TNFRSF11B	tumor necrosis factor receptor superfamily, member 11b	-1.68761	0.026442
26033	ATRNL1	attractin-like 1	-1.78776	0.026442
7430	EZR	ezrin	-2.40974	0.026442
1803	DPP4	dipeptidyl-peptidase 4	-1.74859	0.026442
717	C2	complement component 2	-1.76052	0.0265863
23286	WWC1	WW and C2 domain containing 1	-1.89143	0.0267623
8630	HSD17B6	hydroxysteroid (17-beta) dehydrogenase 6 homolog (mouse)	-4.06991	0.0275103
55008	HERC6	hect domain and RLD 6	-1.68816	0.0281809
642826	ANXA8L2	annexin A8-like 2	-3.92922	0.0287948
1832	DSP	desmoplakin	-2.1855	0.0288211
5920	RARRES3	retinoic acid receptor responder (tazarotene induced) 3	-1.72983	0.0288416
7051	TGM1	transglutaminase 1 (K polypeptide epidermal type I, protein-glutamine-gamma-glutamyltransferase)	-2.66498	0.028991
2697	GJA1	gap junction protein, alpha 1, 43kDa	-1.67279	0.028991
5874	RAB27B	RAB27B, member RAS oncogene family	-2.08375	0.0289941
3791	KDR	kinase insert domain receptor (a type III receptor tyrosine kinase)	-1.8722	0.0290116
1282	COL4A1	collagen, type IV, alpha 1	1.5915	0.0290908
89944	GLB1L2	galactosidase, beta 1-like 2	-1.80019	0.0292517
590	BCHE	butyrylcholinesterase	-2.71794	0.0295613
4162	MCAM	melanoma cell adhesion molecule	1.69472	0.0296175
51299	NRN1	neuritin 1	1.87714	0.029745
55600	ITLN1	intelectin 1 (galactofuranose binding)	-8.36214	0.0298717
161176	C14orf49	chromosome 14 open reading frame 49	1.55484	0.0300339
4886	NPY1R	neuropeptide Y receptor Y1	1.55244	0.0300629
1825	DSC3	desmocollin 3	-3.23641	0.0311234
54361	WNT4	wingless-type MMTV integration site family, member 4	-1.5197	0.0313668
5212	VIT	vitrin	1.99926	0.0313668
3397	ID1	inhibitor of DNA binding 1, dominant negative helix-loop-helix protein	-1.74135	0.0314817
155*	ADRB3	adrenergic, beta-3-, receptor	1.68119	0.0314817
7448	VTN	vitronectin	-1.80689	0.031595
646	BNC1	basonuclin 1	-3.10015	0.031595
8644	AKR1C3	aldo-keto reductase family 1, member C3 (3-alpha hydroxysteroid dehydrogenase, type II)	2.04048	0.0316698
5511	IFI6	interferon, alpha-inducible protein 6	-1.71716	0.0316698
283208	P4HA3	prolyl 4-hydroxylase, alpha polypeptide III	-1.74697	0.0321434
3821	KLRC3	killer cell lectin-like receptor subfamily C, member 3	-1.51348	0.0325282
3880	KRT19	keratin 19	-2.93493	0.0326502
4311	MME	membrane metallo-endopeptidase	1.52632	0.0331818
114905	C1QTNF7	C1q and tumor necrosis factor related protein 7	2.00474	0.0332283
80144	FRAS1	Fraser syndrome 1	-1.7856	0.0332595
730	C7	complement component 7	-2.12594	0.0333636
26022	TMEM98	transmembrane protein 98	-1.81711	0.0347498
999	CDH1	cadherin 1, type 1, E-cadherin (epithelial)	-1.68544	0.0349379
5354	PLP1	proteolipid protein 1	1.54513	0.0350726
1776	DNASE1L3	deoxyribonuclease I-like 3	1.5304	0.0352736
11185	INMT	indolethylamine N-methyltransferase	-2.61908	0.0363254
10082	GPC6	glypican 6	1.59642	0.0363833
10232	MSLN	mesothelin	-2.87909	0.0364783
10060	ABCC9	ATP-binding cassette, sub-family C (CFTR/MRP), member 9	1.70058	0.036711
745	C11orf9	chromosome 11 open reading frame 9	-1.76685	0.0368347
11012	KLK11	kallikrein-related peptidase 11	-1.9946	0.0368406
27445*	PCLO	piccolo (presynaptic cytomatrix protein)	1.50809	0.0370544
5947	RBP1	retinol binding protein 1, cellular	-2.20881	0.0374619
79135	APOO	apolipoprotein O	-1.80923	0.0377656
392352*	PRUNE2	prune homolog 2 (Drosophila)	-1.70767	0.0379005
64078	SLC28A3	solute carrier family 28 (sodium-coupled nucleoside transporter), member 3	-3.31277	0.0379005
80005	DOCK5	dedicator of cytokinesis 5	-1.56265	0.0380009
164312	LRRN4	leucine rich repeat neuronal 4	-3.06779	0.0382276
4857	NOVA1	neuro-oncological ventral antigen 1	1.59391	0.0382617
7348	UPK1B	uroplakin 1B	-3.4205	0.0383158
123036	TC2N	tandem C2 domains, nuclear	-1.74106	0.0386631
4045	LSAMP	limbic system-associated membrane protein	-1.96205	0.0392424
3855	KRT7	keratin 7	-1.94178	0.0393415
343450	KCNT2	potassium channel, subfamily T, member 2	-2.01074	0.0394153
5803	PTPRZ1	protein tyrosine phosphatase, receptor-type, Z polypeptide 1	-1.73726	0.0396761
10231	RCAN2	regulator of calcineurin 2	1.78736	0.0399045
100129258	IQCA1	IQ motif containing with AAA domain 1	-1.71951	0.0400543
9912	RICH2	Rho-type GTPase-activating protein RICH2	-1.56178	0.0408624
23767	FLRT3	fibronectin leucine rich transmembrane protein 3	-3.45529	0.0416585
6546	SLC8A1	solute carrier family 8 (sodium/calcium exchanger), member 1	-1.5198	0.0417807
651536	IGL@	immunoglobulin lambda locus	-1.82462	0.042198
57393*	TMEM27	transmembrane protein 27	-1.60617	0.042198
2619	GAS1	growth arrest-specific 1	-1.57276	0.0422322
5918	RARRES1	retinoic acid receptor responder (tazarotene induced) 1	-2.75822	0.0425663
4969	OGN	osteoglycin	-1.89127	0.0425663
152831	KLB	klotho beta	1.56641	0.0426768
2823	GPM6A	glycoprotein M6A	-1.69604	0.0428912
65987	KCTD14	potassium channel tetramerisation domain containing 14	-1.89117	0.0445006
8870	IER3	immediate early response 3	-1.54497	0.0446439
7434	VIPR2	vasoactive intestinal peptide receptor 2	-1.72226	0.045708
4693	NDP	Norrie disease (pseudoglioma)	-2.08803	0.0458439
6696	SPP1	secreted phosphoprotein 1	1.93818	0.046327
51765	RP6-213H19.1	serine/threonine protein kinase MST4	-1.84613	0.046327
400120	C13orf36	chromosome 13 open reading frame 36	-2.0169	0.046327
7474	WNT5A	wingless-type MMTV integration site family, member 5A	-2.0194	0.0465041
10098	TSPAN5	tetraspanin 5	-1.8686	0.0468826
10529	NEBL	nebulette	-1.90431	0.0472766
53405	CLIC5	chloride intracellular channel 5	-2.3731	0.0475588
2149*	F2R	coagulation factor II (thrombin) receptor	-1.65611	0.0478979
64848*	CDR1	cerebellar degeneration-related protein 1, 34kDa	-2.36402	0.048083
246	ALOX15	arachidonate 15-lipoxygenase	-3.39541	0.0483575
130367	SGPP2	sphingosine-1-phosphate phosphotase 2	-1.95727	0.0490673
3290	HSD11B1	hydroxysteroid (11-beta) dehydrogenase 1	-2.265	0.049304
100132596	XG	Xg blood group	2.11796	0.0494566
4017	LOXL2	lysyl oxidase-like 2	1.54083	0.0497613
3560	IL2RB	interleukin 2 receptor, beta	-1.62504	0.0504826
441420	MYO5B	myosin VB	-1.57026	0.0509344
84612	PARD6B	par-6 partitioning defective 6 homolog beta (C. elegans)	-1.58908	0.0516282
57795	FAM5B	family with sequence similarity 5, member B	-1.78806	0.0524217
4071	TM4SF1	transmembrane 4 L six family member 1	-1.81049	0.0534061
2254	FGF9	fibroblast growth factor 9 (glia-activating factor)	-2.49872	0.053639
344752	AADACL2	arylacetamide deacetylase-like 2	-2.27462	0.053639
55365	TMEM176A	transmembrane protein 176A	-1.59729	0.0536642
253982	ASPHD1	aspartate beta-hydroxylase domain containing 1	-1.51132	0.0536642
1674*	DES	desmin	-1.50024	0.0538321
84870	RSPO3	R-spondin 3 homolog (Xenopus laevis)	-1.78764	0.0539794
5420	PODXL	podocalyxin-like	-1.62894	0.054468
85415	RHPN2	rhophilin, Rho GTPase binding protein 2	-1.60403	0.054468
2277	FIGF	c-fos induced growth factor (vascular endothelial growth factor D)	2.61876	0.0546905
1295	COL8A1	collagen, type VIII, alpha 1	-1.60474	0.0547561
5617	PRL	prolactin	-3.17164	0.0554535
55010*	C12orf48	chromosome 12 open reading frame 48	-1.54449	0.0558775
3627*	CXCL10	chemokine (C-X-C motif) ligand 10	-1.89505	0.0564381
91937	TIMD4	T-cell immunoglobulin and mucin domain containing 4	-1.91133	0.0565779
3559	IL2RA	interleukin 2 receptor, alpha	-1.62849	0.0566241
50507	NOX4	NADPH oxidase 4	1.52724	0.0581932
3512	IGJ	immunoglobulin J polypeptide, linker protein for immunoglobulin alpha and mu polypeptides	-3.08883	0.0589032
2201*	FBN2	fibrillin 2	-1.79864	0.0591138
4036	LRP2	low density lipoprotein-related protein 2	-2.94815	0.0591527
3075*	CFH	complement factor H	-1.57722	0.0594298
4753	NELL2	NEL-like 2 (chicken)	-2.12705	0.060019
53405	CLIC5	chloride intracellular channel 5	-1.86836	0.0606187
10158	PDZK1IP1	PDZK1 interacting protein 1	-1.8844	0.0619539
3037*	HAS2	hyaluronan synthase 2	-1.60208	0.0621354
6424	SFRP4	secreted frizzled-related protein 4	2.44788	0.0622065
3553*	IL1B	interleukin 1, beta	-1.53338	0.0623933
7980	TFPI2	tissue factor pathway inhibitor 2	-2.8782	0.0628498
7128*	TNFAIP3	tumor necrosis factor, alpha-induced protein 3	-1.52483	0.0637415
647121	EMB	embigin homolog (mouse)	-1.5404	0.0642823
7025	NR2F1	nuclear receptor subfamily 2, group F, member 1	-1.68043	0.0643243
221476	PI16	peptidase inhibitor 16	2.27514	0.0647686
1612	DAPK1	death-associated protein kinase 1	-1.75381	0.0659518
1159	CKMT1A	creatine kinase, mitochondrial 1A	-1.6322	0.0668002
1159	CKMT1A	creatine kinase, mitochondrial 1A	-1.57298	0.0668002
22854	NTNG1	netrin G1	-1.70168	0.0671748
84432	PROK1	prokineticin 1	-2.06389	0.0676297
158471*	PRUNE2	prune homolog 2 (Drosophila)	-1.8924	0.0677406
57211	GPR126	G protein-coupled receptor 126	-1.99277	0.0693291
4973	OLR1	oxidized low density lipoprotein (lectin-like) receptor 1	-1.65813	0.0694079
6846	XCL1	chemokine (C motif) ligand 1	-1.62739	0.0700951
2998	GYS2	glycogen synthase 2 (liver)	1.70346	0.070135
1833*	EPYC	epiphycan	-2.38125	0.0704642
57633	LRRN1	leucine rich repeat neuronal 1	-1.89749	0.0719215
51090	PLLP	plasma membrane proteolipid (plasmolipin)	-2.08486	0.0723845
2650	GCNT1	glucosaminyl (N-acetyl) transferase 1, core 2 (beta-1,6-N-acetylglucosaminyltransferase)	-1.69368	0.0731114
100290652	ADAM6	ADAM metallopeptidase domain 6 (pseudogene)	-1.77136	0.0736964
2940*	GSTA1	glutathione S-transferase alpha 1	-2.01967	0.0739615
5655	KLK10	kallikrein-related peptidase 10	-1.60178	0.0745739
441263	UPK3B	uroplakin 3B	-1.90942	0.0747328
10964*	IFI44L	interferon-induced protein 44-like	-1.56968	0.076035
100129324	SMPD3	sphingomyelin phosphodiesterase 3, neutral membrane (neutral sphingomyelinase II)	-1.73392	0.0765462
8796	SCEL	sciellin	-2.05332	0.0784277
4233	MET	met proto-oncogene (hepatocyte growth factor receptor)	-1.52906	0.0803973
5499	ATPGD1	ATP-grasp domain containing 1	-1.77584	0.0806979
9122	SLC16A4	solute carrier family 16, member 4 (monocarboxylic acid transporter 5)	-1.6354	0.0814383
100291682	IGK@	immunoglobulin kappa locus	-2.09564	0.0825175
139221	MUM1L1	melanoma associated antigen (mutated) 1-like 1	-1.52368	0.0827569
122060	SLAIN1	SLAIN motif family, member 1	-1.66754	0.0837925
59350*	RXFP1	relaxin/insulin-like family peptide receptor 1	-2.09965	0.0840434
1306	COL15A1	collagen, type XV, alpha 1	1.5243	0.0842674
51554	CCRL1	chemokine (C-C motif) receptor-like 1	1.60301	0.0859336
283298	OLFML1	olfactomedin-like 1	-1.51105	0.0875636
284654	RSPO1	R-spondin homolog (Xenopus laevis)	-2.15125	0.0878559
151246	SGOL2	shugoshin-like 2 (S. pombe)	-2.06996	0.0880699
3484	IGFBP1	insulin-like growth factor binding protein 1	-2.38688	0.0885116
84976	DISP1	dispatched homolog 1 (Drosophila)	-1.82858	0.0887534
80036	TRPM3	transient receptor potential cation channel, subfamily M, member 3	-1.52377	0.0894215
1303	COL12A1	collagen, type XII, alpha 1	1.58304	0.0922137
1687	DFNA5	deafness, autosomal dominant 5	-1.64989	0.0925695
56245	C21orf62	chromosome 21 open reading frame 62	-1.88955	0.0930481
255743	NPNT	nephronectin	-1.82202	0.095126
84709	C4orf49	chromosome 4 open reading frame 49	-1.98689	0.0964186
85004	RERG	RAS-like, estrogen-regulated, growth inhibitor	-1.57707	0.0976199
13*	AADAC	arylacetamide deacetylase (esterase)	-1.71207	0.0980832
9201	DCLK1	doublecortin-like kinase 1	1.69192	0.099562
7164	TPD52L1	tumor protein D52-like 1	-1.50883	0.0997703
