# Supplementary material for: Characterization of visceral and subcutaneous adipose tissue transcriptome in pregnant women with and without spontaneous labor at term: implication of alternative splicing in the metabolic adaptations of adipose tissue to parturition
Source: publisher site journal article supplement (doi:10.1515/jpm-2015-0259), 2016-01-01
Supplement: Supplementary file 2 [file S1_Text(1).doc]

**Microarray data preprocessing and filtering**

The background correction and quantile normalization methods described 1 and implemented in the *aroma.affymetrix* package2 were used to transform the raw probe intensity measurements in all samples. Exon/transcript pairs that had high potential for leading to false-positive results were removed by applying Affymetrix mandatory filtering3 that involves discarding exons not deemed *present* or belonging to transcripts that were not deemed present. Exons and transcripts were called *present* in a given two-group comparison (e.g. subcutaneous tissues of women in Labor vs Not in Labor) as follows:

*Present Exon*: Consider all four probes (grouped in a probeset) used to target a given exon. Their intensity was compared to the median of intensity of all probes on the array in the two groups of samples, and these probes were deemed present if they were above the median value. If at least three probes of the exon were present in a given sample, then the exon was deemed present in that sample. The exon was deemed present overall if it was present in at least one-half of the samples of *either* of the groups.

*Present Transcript*: Consider all probes used to target a given transcript (targeting all exons of a given transcript cluster). If at least one-half of the probes of the transcript were present in a given sample, then the transcript was deemed present in that sample. The transcript was deemed present overall if it was present in at least one-half of the samples of *each* of the two groups.

We chose to incorporate additional filtering steps from secondary (suggested) and tertiary (optional) filtering described by Affymetrix as follows:

-discarding of probesets with high potential for cross-hybridization (as defined by Affymetrix);

-removal of genes that had very large expression differences between the two groups (above 10 fold); and,

-limiting the search to high-confidence (core) units/transcript clusters based on Ref Seq transcripts and full-length mRNAs.

After all different types of filtering, and depending on the comparison of interest, about 45,000 exons were tested for differential usage.

**Testing for differential exon usage**

In order to identify differential exon usage between groups of samples, we used the FIRMA (Finding Isoforms Using Robust Multichip Analysis) method 4to quantify how far (above or below) a given exon’s expression level was compared to the expected (average) transcript level in a *given* sample.

We applied a t-test for each probeset (typically one per exon) in each transcript based on the FIRMA scores, and found a difference in mean FIRMA scores between groups of two or more combined with a threshold of 0.1 on the False Discovery Rate adjusted p-values (called q-values) obtained from the nominal t-test p-values. This was a more stringent approach than described in another study 4 in which positive results were identified based only on the difference in mean FIRMA scores above 1.5 units.

**Data visualization**

Plotting of the probe-level expression data at exon levels vs. genomic coordinates was performed using functionality provided by the *GenomeGraphs* package. Known isoforms for a given gene were retrieved from the ENSEMBL database using the *biomaRt* package 5.

**1.** Irizarry RA, Hobbs B, Collin F, et al. Exploration, normalization, and summaries of high density oligonucleotide array probe level data. *Biostatistics.* Apr 2003;4(2):249-264.

**2.** Bengtsson H, K. Simpson,J. Bullard, K. Hansen. aroma.affymetrix: A generic framework in R for analyzing small to very large Affymetrix data sets in bounded memory. *Tech Report # 745 of the Department of Statistics, University of California, Berkeley.* February 2008.

**3.** Affymetrix Technical Note. Identifying and Validating Alternative Splicing Events. . http://www.affymetrix.com/support/technical/technotesmain.affx. Accessed 23 January 2012.

**4.** Purdom E, Simpson KM, Robinson MD, Conboy JG, Lapuk AV, Speed TP. FIRMA: a method for detection of alternative splicing from exon array data. *Bioinformatics (Oxford, England).* Aug 1 2008;24(15):1707-1714.

**5.** Durinck S, Moreau Y, Kasprzyk A, et al. BioMart and Bioconductor: a powerful link between biological databases and microarray data analysis. *Bioinformatics (Oxford, England).* Aug 15 2005;21(16):3439-3440.
