# Supplementary material for: Characterization of visceral and subcutaneous adipose tissue transcriptome in pregnant women with and without spontaneous labor at term: implication of alternative splicing in the metabolic adaptations of adipose tissue to parturition
Source: publisher site journal article supplement (doi:10.1515/jpm-2015-0259), 2016-01-01
Supplement: Supplementary file 3 [file Supporting information.doc]

Supporting Information

**S1 Fig. PADOG pathway enrichment plots showing evidence of pathway perturbation associated with parturition in visceral tissues.** The distribution of moderated t-scores of genes in the Reactome *Asparagine N linked glycosylation* pathway as are superposed on the distribution of all genes on the array, and shows more differential expression in this pathways than in the pool of all genes.

**S1 Table. A list of all differentially expressed genes between visceral and subcutaneous adipose tissue of patients with and without spontaneous labor at term**

**S1 File. Microarray data preprocessing and filtering**
